# Supplementary figures and images for: Revisiting the addition of nitriloxides on protoanemonin. A new access to (2E)-3-(3′-arylisoxazol-5′-yl)propenoic acids
Source: Royal Society of Chemistry journal article supplement (doi:10.1039/b001481h), 2000-01-01

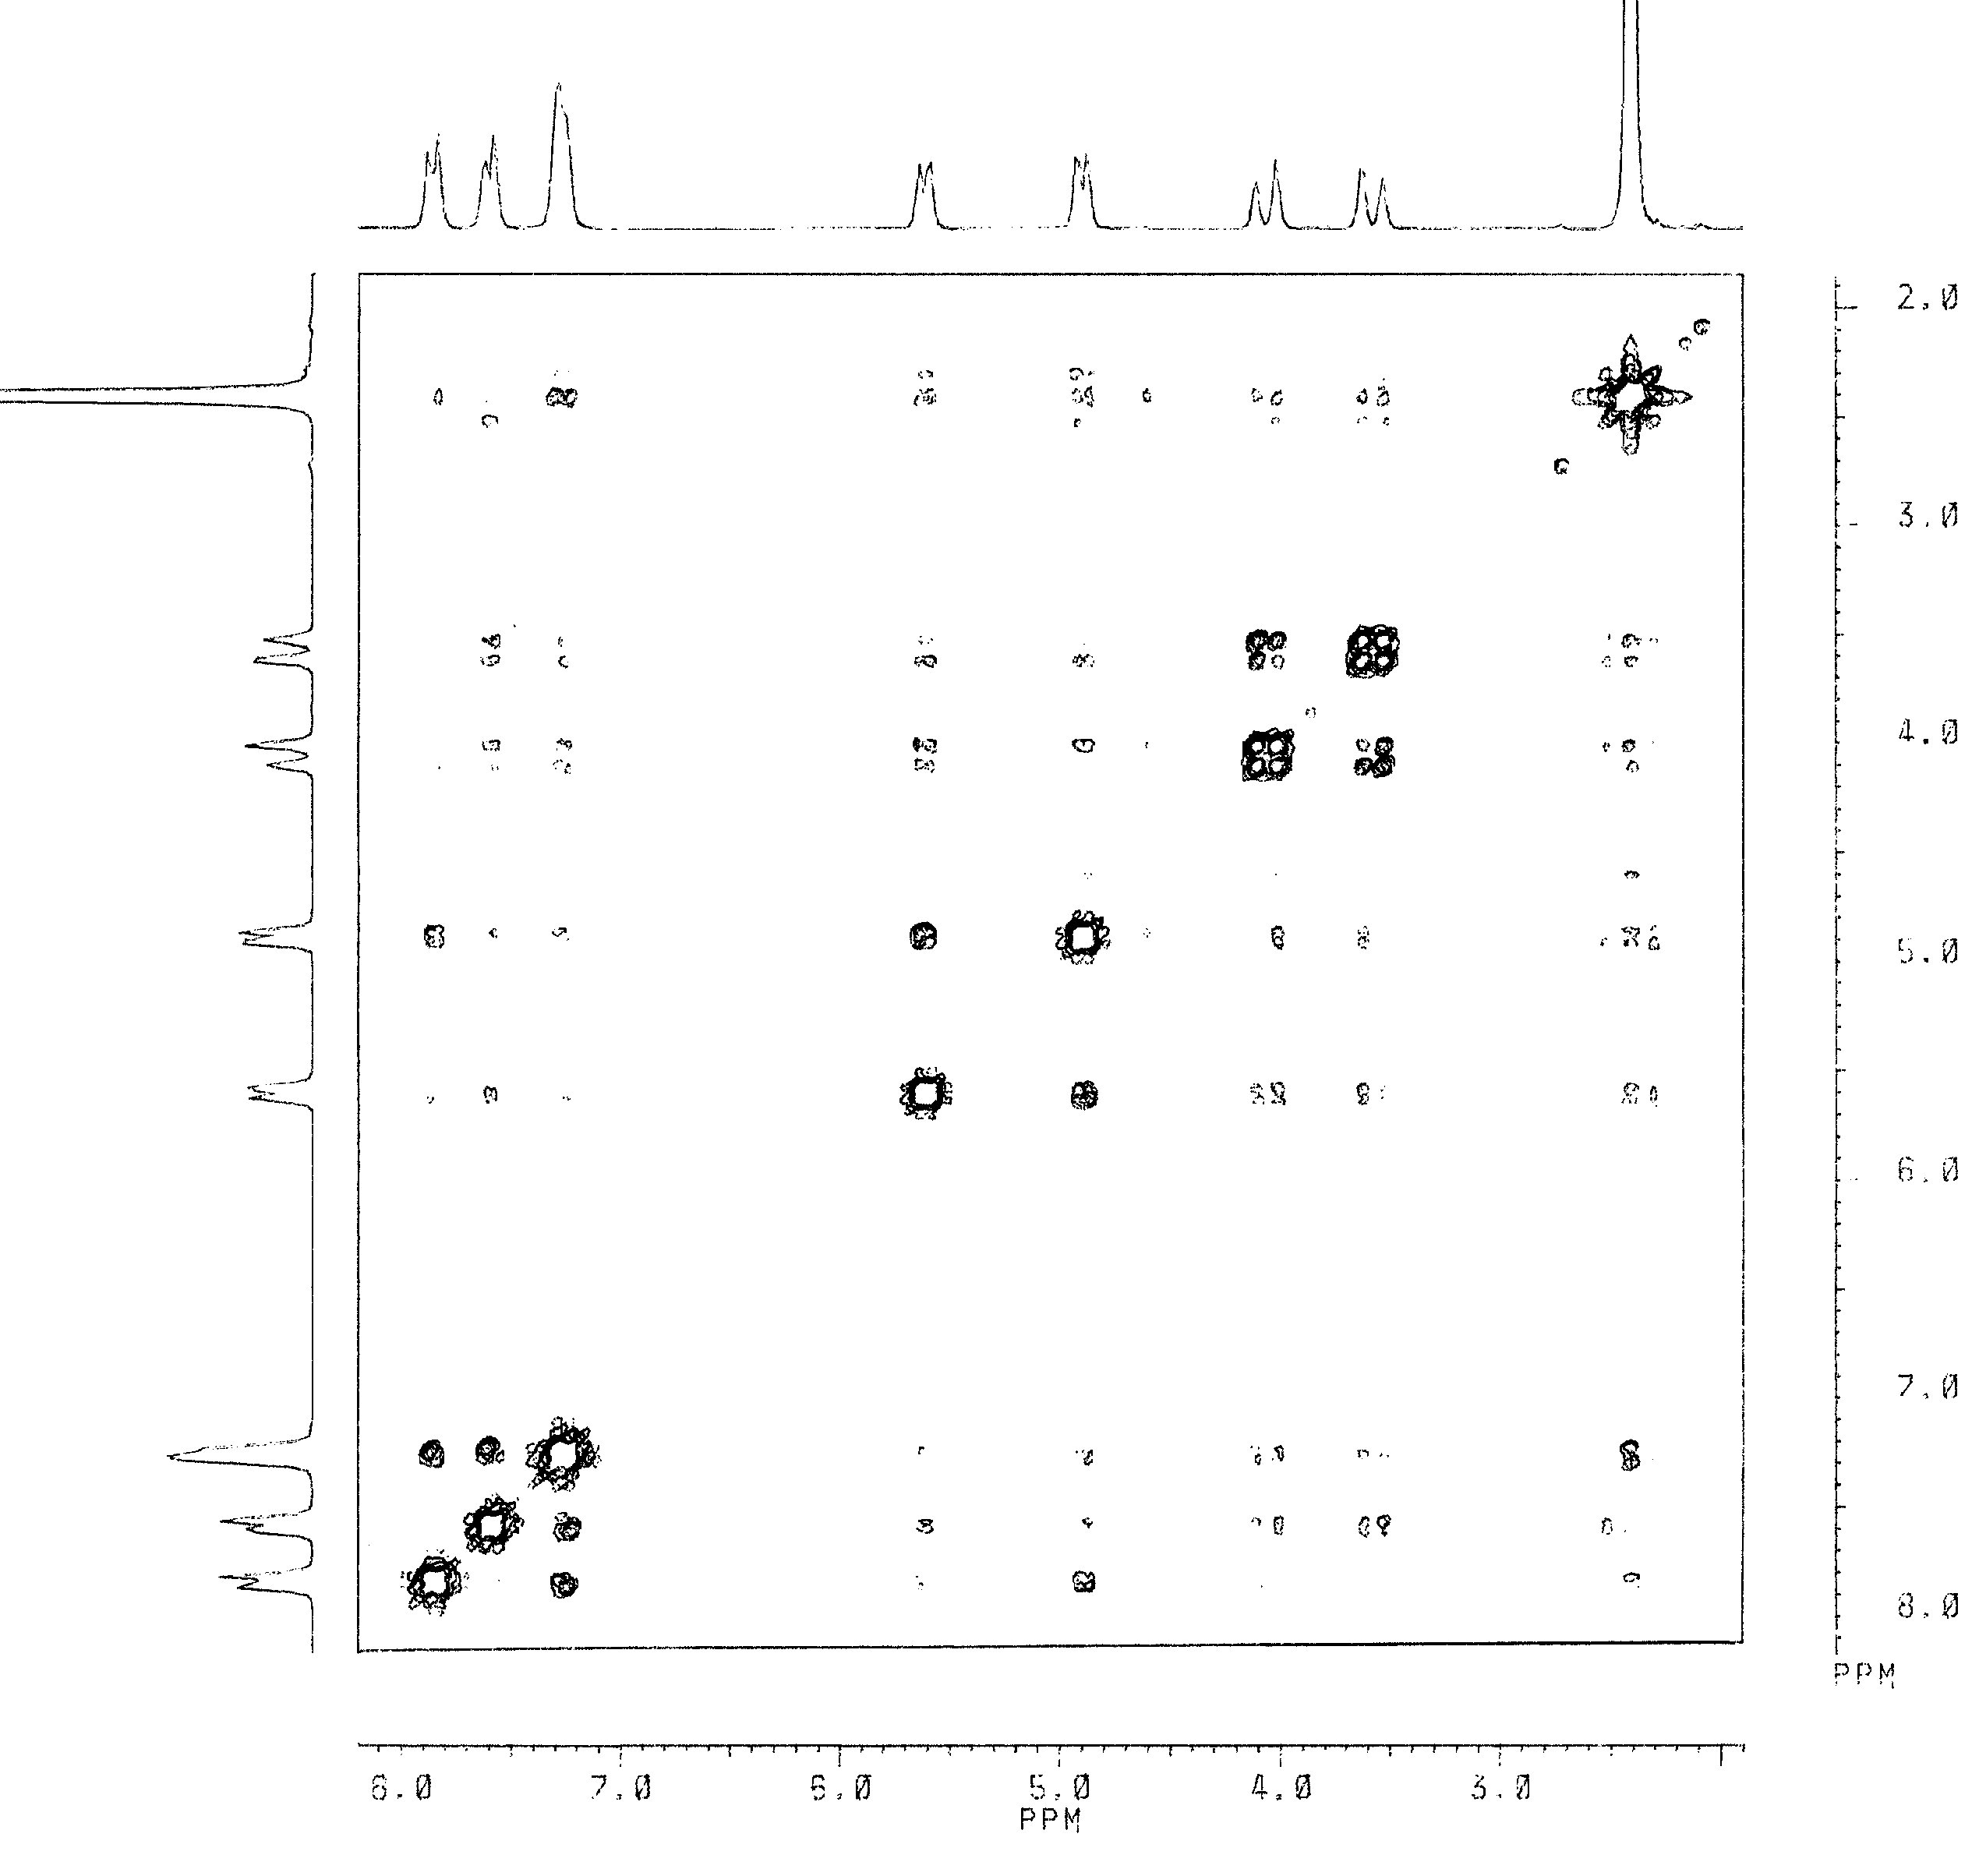


H6a  H3a H4'

**Fig. 1**

Supplement: b001481h.doc [file b001481h.doc]
